# Supplementary material for: Pingwei San Ameliorates Spleen Deficiency-Induced Diarrhea through Intestinal Barrier Protection and Gut Microbiota Modulation
Source: MDPI journal article supplement (doi:10.3390/antiox12051122), 2023-05-19
Supplement: s1 [file s1]

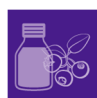

Table S1. Chemical composition of PWS.

| Name                                                  | RT [min] | Calc. MW  | Formula         | Group ArX10a:<br>PWS  | Reference<br>Ion        |
|-------------------------------------------------------|----------|-----------|-----------------|-----------------------|-------------------------|
| DL-Stachydrine                                        | 1.528    | 143.0948  | C7 H13 N O2     | 2.24×10 <sup>10</sup> | [M+H] <sup>+</sup> 1    |
| DL-Arginine                                           | 1.363    | 174.1118  | C6 H14 N4<br>O2 | 2.12×10 <sup>10</sup> | [M+H] <sup>+</sup> 1    |
| (+)-Magnoflorine                                      | 20.083   | 341.16274 | C20 H23 N<br>O4 | 1.88×10 <sup>10</sup> | [M+H] <sup>+</sup> 1    |
| Proline                                               | 1.529    | 115.06344 | C5 H9 N O2      | 1.8×10 <sup>10</sup>  | [M+H] <sup>+</sup> 1    |
| Isoforsythiaside                                      | 20.151   | 624.2055  | C29 H36 O15     | 1.67×10 <sup>10</sup> | [M-H] <sup>-</sup> 1    |
| N-(2,4-Dimethylphenyl formamide                       | 2.683    | 149.08425 | C9 H11 N O      | 1.39×10 <sup>10</sup> | [M+H] <sup>+</sup> 1    |
| Magnolol                                              | 38.606   | 266.1306  | C18 H18 O2      | 1.3×10 <sup>10</sup>  | [M-H] <sup>-</sup> 1    |
| Hesperidin                                            | 22.517   | 610.18966 | C28 H34 O15     | 1.16×10 <sup>10</sup> | [M-H] <sup>-</sup> 1    |
| Diammonium glycyrrhizinate                            | 29.737   | 822.40405 | C42 H62 O16     | 9.81×10 <sup>9</sup>  | [M-H] <sup>-</sup> 1    |
| Naringin                                              | 21.976   | 580.17936 | C27 H32 O14     | 8.99×10 <sup>9</sup>  | [M-H] <sup>-</sup> 1    |
| L-(-)-Malic acid                                      | 1.565    | 134.02151 | C4 H6 O5        | 8.35×10 <sup>9</sup>  | [M-H] <sup>-</sup> 1    |
| Purpureaside C                                        | 19.215   | 786.25855 | C35 H46 O20     | 8.13×10 <sup>9</sup>  | [M-H] <sup>-</sup> 1    |
| Choline                                               | 1.398    | 103.09974 | C5 H13 N O      | 8.03×10 <sup>9</sup>  | [M+H] <sup>+</sup> 1    |
| Citric acid                                           | 1.606    | 192.02711 | C6 H8 O7        | 7.72×10 <sup>9</sup>  | [M-H] <sup>-</sup> 1    |
| D-(-)-Quinic acid                                     | 1.475    | 192.06343 | C7 H12 O6       | 6.1×10 <sup>9</sup>   | [M-H] <sup>-</sup> 1    |
| Liquiritin                                            | 21.484   | 418.12654 | C21 H22 O9      | 5.79×10 <sup>9</sup>  | [M-H] <sup>-</sup> 1    |
| Nobiletin                                             | 32.114   | 402.13154 | C21 H22 O8      | 5.7×10 <sup>9</sup>   | [M+H] <sup>+</sup> 1    |
| Gluconic acid                                         | 1.407    | 196.05824 | C6 H12 O7       | 5.52×10 <sup>9</sup>  | [M-H] <sup>-</sup> 1    |
| Liquiritigenin-7-O-β-D-apiosyl-4'-<br>O-β-D-glucoside | 21.296   | 550.16877 | C26 H30 O13     | 4.96×10 <sup>9</sup>  | [M-H] <sup>-</sup> 1    |
| α,α-Trehalose                                         | 1.532    | 342.11618 | C12 H22 O11     | 4.55×10 <sup>9</sup>  | [M-H] <sup>-</sup> 1    |
| Isoliquiritigenin                                     | 21.489   | 256.07357 | C15 H12 O4      | 4.42×10 <sup>9</sup>  | [M+H] <sup>+</sup> 1    |
| Apomorphine                                           | 21.554   | 267.12587 | C17 H17 N<br>O2 | 3.34×10 <sup>9</sup>  | [M+H] <sup>+</sup> 1    |
| Forsythoside E                                        | 17.429   | 462.1738  | C20 H30 O12     | 3.16×10 <sup>9</sup>  | [M-H] <sup>-</sup> 1    |
| Maltopentaose                                         | 5.179    | 828.27497 | C30 H52 O26     | 3.02×10 <sup>9</sup>  | [M-H] <sup>-</sup> 1    |
| Hesperetin                                            | 22.516   | 302.07867 | C16 H14 O6      | 2.86×10 <sup>9</sup>  | [M+H] <sup>+</sup> 1    |
| Pipecolic acid                                        | 1.555    | 129.07916 | C6 H11 N O2     | 2.86×10 <sup>9</sup>  | [M+H] <sup>+</sup> 1    |
| 4-Oxoproline                                          | 3.094    | 129.04267 | C5 H7 N O3      | 2.75×10 <sup>9</sup>  | [M-H] <sup>-</sup> 1    |
| D-Raffinose                                           | 2.229    | 504.16919 | C18 H32 O16     | 2.75×10 <sup>9</sup>  | [M+FA-H] <sup>-</sup> 1 |
| Inositol                                              | 1.431    | 180.06343 | C6 H12 O6       | 2.57×10 <sup>9</sup>  | [M-H] <sup>-</sup> 1    |
| Melittoside                                           | 18.893   | 524.17433 | C21 H32 O15     | 2.51×10 <sup>9</sup>  | [M-H] <sup>-</sup> 1    |
| 4-Vinylphenol                                         | 17.845   | 120.05751 | C8 H8 O         | 2.49×10 <sup>9</sup>  | [M+FA-H] <sup>-</sup> 1 |

|                                                |        |           |                  |                      |            |
|------------------------------------------------|--------|-----------|------------------|----------------------|------------|
| (15Z)-9,12,13-Trihydroxy-15-octa-decenoic acid | 28.222 | 330.24058 | C18 H34 O5       | 2.44×10 <sup>9</sup> | [M-H]-1    |
| Asparagine                                     | 1.35   | 132.05355 | C4 H8 N2 O3      | 2.31×10 <sup>9</sup> | [M-H]-1    |
| Adenosine                                      | 8.613  | 267.09691 | C10 H13 N5<br>O4 | 2.1×10 <sup>9</sup>  | [M+H]+1    |
| Stachyose                                      | 3.305  | 666.22232 | C24 H42 O21      | 2.04×10 <sup>9</sup> | [M+FA-H]-1 |
| Didymin                                        | 24.7   | 594.19495 | C28 H34 O14      | 2.04×10 <sup>9</sup> | [M+H]+1    |
| BMK methyl glycidate                           | 18.616 | 192.07869 | C11 H12 O3       | 1.96×10 <sup>9</sup> | [M+H]+1    |
| trans-3-Indoleacrylic acid                     | 17.008 | 187.06333 | C11 H9 N O2      | 1.96×10 <sup>9</sup> | [M+H]+1    |
| Tangeritin                                     | 34.001 | 372.12099 | C20 H20 O7       | 1.93×10 <sup>9</sup> | [M+H]+1    |
| Skimmin                                        | 20.162 | 324.08452 | C15 H16 O8       | 1.88×10 <sup>9</sup> | [M+H]+1    |
| Ononin                                         | 23.737 | 430.12658 | C22 H22 O9       | 1.84×10 <sup>9</sup> | [M+H]+1    |
| L-Phenylalanine                                | 8.781  | 165.07914 | C9 H11 N O2      | 1.57×10 <sup>9</sup> | [M+H]+1    |
| Vicenin II                                     | 19.547 | 594.15891 | C27 H30 O15      | 1.56×10 <sup>9</sup> | [M-H]-1    |
| Adenine                                        | 2.548  | 135.05462 | C5 H5 N5         | 1.47×10 <sup>9</sup> | [M+H]+1    |
| Trigonelline                                   | 1.505  | 137.04785 | C7 H7 N O2       | 1.33×10 <sup>9</sup> | [M+H]+1    |
| L-Tryptophan                                   | 17.007 | 204.08987 | C11 H12 N2<br>O2 | 1.31×10 <sup>9</sup> | [M+H]+1    |
| Glabrolide                                     | 27.14  | 468.32414 | C30 H44 O4       | 1.3×10 <sup>9</sup>  | [M+H]+1    |
| Naringenin                                     | 21.975 | 272.06829 | C15 H12 O5       | 1.3×10 <sup>9</sup>  | [M+H]+1    |
| Isosinensetin                                  | 28.871 | 372.12084 | C20 H20 O7       | 1.28×10 <sup>9</sup> | [M+H]+1    |
| Methoxyphenamine                               | 6.564  | 179.13114 | C11 H17 N O      | 1.16×10 <sup>9</sup> | [M+H]+1    |
| Synephrine                                     | 2.681  | 167.09479 | C9 H13 N O2      | 1.14×10 <sup>9</sup> | [M+H]+1    |
| Sinensetin                                     | 30.436 | 372.12084 | C20 H20 O7       | 1.07×10 <sup>9</sup> | [M+H]+1    |
| 3,4,5-Trimethoxyphenyl β-D-glucopyranoside     | 18.84  | 346.12656 | C15 H22 O9       | 1.04×10 <sup>9</sup> | [M+FA-H]-1 |
| N-Acetyl-L-phenylalanine                       | 20.783 | 207.08957 | C11 H13 N<br>O3  | 9.79×10 <sup>8</sup> | [M-H]-1    |
| Cinnamaldehyde                                 | 18.611 | 132.05751 | C9 H8 O          | 9.66×10 <sup>8</sup> | [M+H]+1    |
| Isoliquiritin                                  | 23.729 | 418.12646 | C21 H22 O9       | 9.4×10 <sup>8</sup>  | [M-H]-1    |
| Plantamajoside                                 | 19.884 | 640.20069 | C29 H36 O16      | 9.39×10 <sup>8</sup> | [M-H]-1    |
| β-D-Glucopyranuronic acid                      | 1.41   | 194.04262 | C6 H10 O7        | 9.1×10 <sup>8</sup>  | [M-H]-1    |
| 7-Methoxycoumarin                              | 18.501 | 176.04738 | C10 H8 O3        | 8.47×10 <sup>8</sup> | [M+H]+1    |
| Guanosine                                      | 9.246  | 283.09178 | C10 H13 N5<br>O5 | 8.23×10 <sup>8</sup> | [M-H]-1    |
| Rutin                                          | 21.203 | 610.15365 | C27 H30 O16      | 7.79×10 <sup>8</sup> | [M-H]-1    |
| Caffeic acid                                   | 19.431 | 180.04236 | C9 H8 O4         | 7.76×10 <sup>8</sup> | [M-H]-1    |
| Fumaric acid                                   | 1.565  | 116.01087 | C4 H4 O4         | 7.53×10 <sup>8</sup> | [M-H]-1    |
| Honokiol                                       | 36.539 | 266.1306  | C18 H18 O2       | 7.3×10 <sup>8</sup>  | [M-H]-1    |
| 6-Demethoxytangeretin                          | 30.56  | 342.11046 | C19 H18 O6       | 7.19×10 <sup>8</sup> | [M+H]+1    |

|                                      |        |           |                 |                      |            |
|--------------------------------------|--------|-----------|-----------------|----------------------|------------|
| Chlorogenic acid                     | 17.342 | 354.09513 | C16 H18 O9      | 6.75×10 <sup>8</sup> | [M-H]-1    |
| L-Aspartic acid                      | 1.361  | 133.0375  | C4 H7 N O4      | 6.74×10 <sup>8</sup> | [M-H]-1    |
| Azelaic acid                         | 23.03  | 188.10493 | C9 H16 O4       | 6.58×10 <sup>8</sup> | [M-H]-1    |
| α-Cyperone                           | 27.173 | 218.16704 | C15 H22 O       | 6.54×10 <sup>8</sup> | [M+H]+1    |
| Guanine                              | 9.257  | 151.04955 | C5 H5 N5 O      | 6.44×10 <sup>8</sup> | [M+H]+1    |
| Curcumol                             | 27.173 | 236.17757 | C15 H24 O2      | 6.28×10 <sup>8</sup> | [M+H]+1    |
| Isosakuranetin                       | 24.703 | 286.08381 | C16 H14 O5      | 6.06×10 <sup>8</sup> | [M+H]+1    |
| Protocatechualdehyde                 | 17.485 | 138.03168 | C7 H6 O3        | 6.03×10 <sup>8</sup> | [M-H]-1    |
| 2-Furoic acid                        | 1.62   | 112.01601 | C5 H4 O3        | 5.41×10 <sup>8</sup> | [M-H]-1    |
| Neochlorogenic acid                  | 18.758 | 354.09487 | C16 H18 O9      | 5.4×10 <sup>8</sup>  | [M+H]+1    |
| Liquiritigenin                       | 24.961 | 256.07359 | C15 H12 O4      | 5.3×10 <sup>8</sup>  | [M-H]-1    |
| Calceolarioside B                    | 20.545 | 478.1476  | C23 H26 O11     | 5.27×10 <sup>8</sup> | [M-H]-1    |
| Bioside                              | 18.503 | 462.17377 | C20 H30 O12     | 5.25×10 <sup>8</sup> | [M-H]-1    |
| 18 β-Glycyrrhetintic Acid            | 29.739 | 470.33965 | C30 H46 O4      | 5.19×10 <sup>8</sup> | [M+H]+1    |
| Docosanamide                         | 55.371 | 339.35007 | C22 H45 N O     | 5.06×10 <sup>8</sup> | [M+H]+1    |
| Guanosine-3',5'-cyclic monophosphate | 6.256  | 345.04753 | C10 H12 N5 O7 P | 4.88×10 <sup>8</sup> | [M-H]-1    |
| Prunin                               | 21.989 | 434.12132 | C21 H22 O10     | 4.86×10 <sup>8</sup> | [M+H]+1    |
| Eriocitrin                           | 21.014 | 596.17457 | C27 H32 O15     | 4.85×10 <sup>8</sup> | [M-H]-1    |
| Poliumoside                          | 19.793 | 770.26393 | C35 H46 O19     | 4.81×10 <sup>8</sup> | [M-H]-1    |
| Morphine                             | 19.455 | 285.13652 | C17 H19 N O3    | 4.65×10 <sup>8</sup> | [M+H]+1    |
| Corchorifatty acid F                 | 27.047 | 328.22493 | C18 H32 O5      | 4.51×10 <sup>8</sup> | [M-H]-1    |
| Isoalantolactone                     | 17.804 | 232.14639 | C15 H20 O2      | 4.34×10 <sup>8</sup> | [M+H]+1    |
| Narirutin                            | 19.801 | 580.17949 | C27 H32 O14     | 4.2×10 <sup>8</sup>  | [M+H]+1    |
| Nicotinamide                         | 3.272  | 122.04809 | C6 H6 N2 O      | 4.03×10 <sup>8</sup> | [M+H]+1    |
| Limonin                              | 21.2   | 470.19417 | C26 H30 O8      | 4.01×10 <sup>8</sup> | [M+H]+1    |
| Rhoifolin                            | 22.112 | 578.16411 | C27 H30 O14     | 3.86×10 <sup>8</sup> | [M+FA-H]-1 |
| Ferulic acid                         | 19.22  | 194.05795 | C10 H10 O4      | 3.41×10 <sup>8</sup> | [M+H]+1    |
| 4-Indolecarbaldehyde                 | 17.008 | 145.05278 | C9 H7 N O       | 3.32×10 <sup>8</sup> | [M+H]+1    |
| 2-Methylbenzoic acid                 | 19.431 | 136.0525  | C8 H8 O2        | 3.28×10 <sup>8</sup> | [M-H]-1    |
| Succinic acid                        | 3.816  | 118.02666 | C4 H6 O4        | 3.28×10 <sup>8</sup> | [M-H]-1    |
| Argininosuccinic acid                | 2.537  | 290.12281 | C10 H18 N4 O6   | 3.2×10 <sup>8</sup>  | [M+H]+1    |
| Eleutheroside E                      | 20.305 | 742.2688  | C34 H46 O18     | 3.2×10 <sup>8</sup>  | [M+FA-H]-1 |
| 4-Guanidinobutyric acid              | 2.419  | 145.0853  | C5 H11 N3 O2    | 3.07×10 <sup>8</sup> | [M+H]+1    |
| Isorhamnetin-3-O-rutinoside          | 22.119 | 624.1693  | C28 H32 O16     | 2.89×10 <sup>8</sup> | [M+H]+1    |
| Formononetin                         | 23.736 | 268.07346 | C16 H12 O4      | 2.87×10 <sup>8</sup> | [M+H]+1    |

|                                                 |        |           |               |                      |                         |
|-------------------------------------------------|--------|-----------|---------------|----------------------|-------------------------|
| 9-Oxo-ODE                                       | 28.219 | 294.21959 | C18 H30 O3    | 2.87×10 <sup>8</sup> | [M+H] <sup>+</sup> 1    |
| Germacrone                                      | 25.891 | 218.16704 | C15 H22 O     | 2.86×10 <sup>8</sup> | [M+H] <sup>+</sup> 1    |
| 2-Isopropylmalic acid                           | 17.872 | 176.06846 | C7 H12 O5     | 2.84×10 <sup>8</sup> | [M-H] <sup>-</sup> 1    |
| Glutaric anhydride                              | 1.435  | 114.03167 | C5 H6 O3      | 2.76×10 <sup>8</sup> | [M-H] <sup>-</sup> 1    |
| L-Histidine                                     | 1.366  | 155.06964 | C6 H9 N3 O2   | 2.75×10 <sup>8</sup> | [M+H] <sup>+</sup> 1    |
| Maleic acid                                     | 1.982  | 116.01087 | C4 H4 O4      | 2.73×10 <sup>8</sup> | [M-H] <sup>-</sup> 1    |
| 6-Methylquinoline                               | 17.008 | 143.07353 | C10 H9 N      | 2.73×10 <sup>8</sup> | [M+H] <sup>+</sup> 1    |
| 2-Hydroxy-4-methoxybenzaldehyde                 | 18.878 | 152.04736 | C8 H8 O3      | 2.67×10 <sup>8</sup> | [M+H] <sup>+</sup> 1    |
| Benzoic acid                                    | 19.513 | 122.03677 | C7 H6 O2      | 2.61×10 <sup>8</sup> | [M-H] <sup>-</sup> 1    |
| Uridine                                         | 5.093  | 244.06958 | C9 H12 N2 O6  | 2.61×10 <sup>8</sup> | [M-H] <sup>-</sup> 1    |
| 3-Hydroxybenzoic acid                           | 23.022 | 138.03168 | C7 H6 O3      | 2.51×10 <sup>8</sup> | [M-H] <sup>-</sup> 1    |
| Acetophenone                                    | 5.15   | 120.05756 | C8 H8 O       | 2.48×10 <sup>8</sup> | [M+H] <sup>+</sup> 1    |
| 5-Amino-3-(4-methoxyphenyl)-5-oxopentanoic acid | 7.24   | 237.10013 | C12 H15 N O4  | 2.34×10 <sup>8</sup> | [M+H] <sup>+</sup> 1    |
| Quillaic acid                                   | 28.556 | 486.33434 | C30 H46 O5    | 2.26×10 <sup>8</sup> | [M+H] <sup>+</sup> 1    |
| Vicenin III                                     | 20.246 | 564.14823 | C26 H28 O14   | 2.25×10 <sup>8</sup> | [M+H] <sup>+</sup> 1    |
| 1,2,3,4-Tetramethyl-1,3-cyclopentadiene         | 30.296 | 122.10958 | C9 H14        | 2.25×10 <sup>8</sup> | [M+H] <sup>+</sup> 1    |
| Lariciresinol 4-O-glucoside                     | 21.286 | 522.21035 | C26 H34 O11   | 2.17×10 <sup>8</sup> | [M+FA-H] <sup>-</sup> 1 |
| 2,3-Dihydroxybenzoic acid                       | 14.75  | 154.02669 | C7 H6 O4      | 2.1×10 <sup>8</sup>  | [M-H] <sup>-</sup> 1    |
| 5-O-Demethylnobiletin                           | 35.702 | 388.11595 | C20 H20 O8    | 2.06×10 <sup>8</sup> | [M+H] <sup>+</sup> 1    |
| Isosakuranin                                    | 24.704 | 448.13674 | C22 H24 O10   | 2.02×10 <sup>8</sup> | [M+H] <sup>+</sup> 1    |
| Anabasine                                       | 6.484  | 162.11577 | C10 H14 N2    | 1.93×10 <sup>8</sup> | [M+H] <sup>+</sup> 1    |
| trans-Aconitic acid                             | 1.614  | 174.01639 | C6 H6 O6      | 1.92×10 <sup>8</sup> | [M-H] <sup>-</sup> 1    |
| Kojic acid                                      | 15.643 | 142.0268  | C6 H6 O4      | 1.77×10 <sup>8</sup> | [M+H] <sup>+</sup> 1    |
| Curdione                                        | 25.974 | 236.17757 | C15 H24 O2    | 1.75×10 <sup>8</sup> | [M+H] <sup>+</sup> 1    |
| D-Glucosamine                                   | 1.417  | 179.07955 | C6 H13 N O5   | 1.7×10 <sup>8</sup>  | [M+H] <sup>+</sup> 1    |
| (±)-Absciscic acid                              | 24.796 | 264.1362  | C15 H20 O4    | 1.68×10 <sup>8</sup> | [M-H] <sup>-</sup> 1    |
| 2'-Deoxyadenosine                               | 9.988  | 251.10192 | C10 H13 N5 O3 | 1.64×10 <sup>8</sup> | [M+H] <sup>+</sup> 1    |
| Kaempferol-3-O-rutinoside                       | 21.977 | 594.15891 | C27 H30 O15   | 1.58×10 <sup>8</sup> | [M-H] <sup>-</sup> 1    |
| Phenibut                                        | 5.115  | 179.09473 | C10 H13 N O2  | 1.57×10 <sup>8</sup> | [M+H] <sup>+</sup> 1    |
| Methyl 4-hydroxy-3-methoxycinnamate             | 23.11  | 208.0737  | C11 H12 O4    | 1.53×10 <sup>8</sup> | [M+H] <sup>+</sup> 1    |
| Oleamide                                        | 47.093 | 281.27202 | C18 H35 N O   | 1.51×10 <sup>8</sup> | [M+H] <sup>+</sup> 1    |
| Boldine                                         | 20.698 | 327.14696 | C19 H21 N O4  | 1.44×10 <sup>8</sup> | [M+H] <sup>+</sup> 1    |

|                                                        |        |           |                    |                      |         |
|--------------------------------------------------------|--------|-----------|--------------------|----------------------|---------|
| Icaritin                                               | 33.038 | 368.12615 | C21 H20 O6         | 1.43×10 <sup>8</sup> | [M-H]-1 |
| Sarracenin                                             | 9.026  | 226.08399 | C11 H14 O5         | 1.43×10 <sup>8</sup> | [M+H]+1 |
| (+)-Syringaresinol                                     | 22.219 | 418.16293 | C22 H26 O8         | 1.42×10 <sup>8</sup> | [M-H]-1 |
| Quercetin                                              | 21.206 | 302.04253 | C15 H10 O7         | 1.4×10 <sup>8</sup>  | [M+H]+1 |
| L-Tyrosine                                             | 1.678  | 181.07413 | C9 H11 N O3        | 1.37×10 <sup>8</sup> | [M+H]+1 |
| Adenosine 5'-monophosphate                             | 2.806  | 347.06324 | C10 H14 N5<br>O7 P | 1.36×10 <sup>8</sup> | [M+H]+1 |
| 4,5-Dicaffeoylquinic acid                              | 22.806 | 516.12701 | C25 H24 O12        | 1.3×10 <sup>8</sup>  | [M-H]-1 |
| Cytosine                                               | 2.47   | 111.04332 | C4 H5 N3 O         | 1.29×10 <sup>8</sup> | [M+H]+1 |
| 1,3-Dicaffeoylquinic acid                              | 22.348 | 516.12703 | C25 H24 O12        | 1.28×10 <sup>8</sup> | [M-H]-1 |
| o-Veratraldehyde                                       | 17.134 | 166.0631  | C9 H10 O3          | 1.27×10 <sup>8</sup> | [M+H]+1 |
| Parthenolide                                           | 26.674 | 248.14131 | C15 H20 O3         | 1.26×10 <sup>8</sup> | [M+H]+1 |
| (-)-Caryophyllene oxide                                | 24.637 | 220.1828  | C15 H24 O          | 1.24×10 <sup>8</sup> | [M+H]+1 |
| Uracil                                                 | 5.091  | 112.0273  | C4 H4 N2 O2        | 1.23×10 <sup>8</sup> | [M+H]+1 |
| Glycyrrhizic acid                                      | 31.424 | 822.40331 | C42 H62 O16        | 1.22×10 <sup>8</sup> | [M+H]+1 |
| Adenosine 3'5'-cyclic monophosphate                    | 5.239  | 329.05266 | C10 H12 N5<br>O6 P | 1.21×10 <sup>8</sup> | [M+H]+1 |
| 5'-S-Methyl-5'-thioadenosine                           | 17.716 | 297.08965 | C11 H15 N5<br>O3 S | 1.21×10 <sup>8</sup> | [M+H]+1 |
| Methyl cinnamate                                       | 18.23  | 162.06809 | C10 H10 O2         | 1.18×10 <sup>8</sup> | [M+H]+1 |
| Acetylarginine                                         | 2.502  | 216.12264 | C8 H16 N4<br>O3    | 1.18×10 <sup>8</sup> | [M+H]+1 |
| Wilforlide A                                           | 25.054 | 454.34462 | C30 H46 O3         | 1.17×10 <sup>8</sup> | [M+H]+1 |
| Codeine                                                | 21.278 | 299.15212 | C18 H21 N<br>O3    | 1.11×10 <sup>8</sup> | [M+H]+1 |
| Paratocarpin G                                         | 39.891 | 424.1888  | C25 H28 O6         | 1.08×10 <sup>8</sup> | [M-H]-1 |
| 4-Aminophenol                                          | 3.007  | 109.05285 | C6 H7 N O          | 1.07×10 <sup>8</sup> | [M+H]+1 |
| Isomeranzin                                            | 23.953 | 260.10488 | C15 H16 O4         | 1.07×10 <sup>8</sup> | [M+H]+1 |
| Neodiosmin                                             | 22.309 | 608.17468 | C28 H32 O15        | 1.06×10 <sup>8</sup> | [M+H]+1 |
| Atractylenolide III                                    | 33.455 | 248.14131 | C15 H20 O3         | 1.05×10 <sup>8</sup> | [M+H]+1 |
| Methyl hesperidin                                      | 23.618 | 624.20596 | C29 H36 O15        | 1.04×10 <sup>8</sup> | [M-H]-1 |
| 4-Methoxysalicylic acid                                | 16.807 | 168.04225 | C8 H8 O4           | 1.04×10 <sup>8</sup> | [M-H]-1 |
| Nabumetone                                             | 24.804 | 228.11507 | C15 H16 O2         | 1.03×10 <sup>8</sup> | [M+H]+1 |
| Apigenin 7-O-(2G-rhamnosyl)gentiobioside               | 19.851 | 740.21666 | C33 H40 O19        | 1.02×10 <sup>8</sup> | [M+H]+1 |
| 2-Hydroxyacetophenone                                  | 16.635 | 136.05252 | C8 H8 O2           | 1.01×10 <sup>8</sup> | [M+H]+1 |
| 1-Caffeoylquinic acid                                  | 16.436 | 354.09512 | C16 H18 O9         | 9.93×10 <sup>7</sup> | [M-H]-1 |
| 4-(3,4-Dihydroxyphenyl)-6,7-dihydroxy-2-naphthoic acid | 26.22  | 312.06357 | C17 H12 O6         | 9.9×10 <sup>7</sup>  | [M-H]-1 |
| N-Acetyl-DL-tryptophan                                 | 21.682 | 246.10045 | C13 H14 N2<br>O3   | 9.72×10 <sup>7</sup> | [M-H]-1 |

|                                                |        |           |                 |                      |                      |
|------------------------------------------------|--------|-----------|-----------------|----------------------|----------------------|
| 3-Methoxy-5,7,3',4'-tetrahydroxy-flavone       | 22.109 | 316.05831 | C16 H12 O7      | 9.56×10 <sup>7</sup> | [M+H] <sup>+</sup> 1 |
| 3-tert-Butyladipic acid                        | 24.974 | 202.12057 | C10 H18 O4      | 9.22×10 <sup>7</sup> | [M-H] <sup>-</sup> 1 |
| 5,7,3',4'-Tetrahydroxy-6,8-diprenyli-soflavone | 41.208 | 422.17326 | C25 H26 O6      | 9.21×10 <sup>7</sup> | [M+H] <sup>+</sup> 1 |
| Catechol                                       | 14.747 | 110.03672 | C6 H6 O2        | 8.81×10 <sup>7</sup> | [M-H] <sup>-</sup> 1 |
| Demethylcoclaurine hydrochloride               | 17.977 | 271.12074 | C16 H17 N O3    | 8.78×10 <sup>7</sup> | [M+H] <sup>+</sup> 1 |
| Salicylic acid                                 | 17.952 | 138.03168 | C7 H6 O3        | 8.78×10 <sup>7</sup> | [M-H] <sup>-</sup> 1 |
| Scopoletin                                     | 21.744 | 192.04239 | C10 H8 O4       | 8.75×10 <sup>7</sup> | [M+H] <sup>+</sup> 1 |
| 3-Methoxybenzaldehyde                          | 20.548 | 136.05252 | C8 H8 O2        | 8.74×10 <sup>7</sup> | [M+H] <sup>+</sup> 1 |
| Atractylenolide II                             | 37.76  | 232.14646 | C15 H20 O2      | 8.56×10 <sup>7</sup> | [M+H] <sup>+</sup> 1 |
| Sinapic acid                                   | 21.783 | 224.06851 | C11 H12 O5      | 8.55×10 <sup>7</sup> | [M-H] <sup>-</sup> 1 |
| 19-Nortestosterone                             | 27.07  | 274.19328 | C18 H26 O2      | 8.48×10 <sup>7</sup> | [M+H] <sup>+</sup> 1 |
| Scoparone                                      | 23.959 | 206.05795 | C11 H10 O4      | 8.48×10 <sup>7</sup> | [M+H] <sup>+</sup> 1 |
| Sedanolid                                      | 28.24  | 194.13082 | C12 H18 O2      | 8.38×10 <sup>7</sup> | [M+H] <sup>+</sup> 1 |
| 1,5-Naphthalenediamine                         | 16.998 | 158.08441 | C10 H10 N2      | 7.94×10 <sup>7</sup> | [M+H] <sup>+</sup> 1 |
| Leucylproline                                  | 17.42  | 228.14746 | C11 H20 N2 O3   | 7.93×10 <sup>7</sup> | [M+H] <sup>+</sup> 1 |
| 7-Hydroxycoumarin                              | 21.583 | 162.03172 | C9 H6 O3        | 7.81×10 <sup>7</sup> | [M-H] <sup>-</sup> 1 |
| 3-Coumaric acid                                | 21.093 | 164.04743 | C9 H8 O3        | 7.64×10 <sup>7</sup> | [M-H] <sup>-</sup> 1 |
| α-Lactose                                      | 2.232  | 342.1165  | C12 H22 O11     | 7.5×10 <sup>7</sup>  | [M+H] <sup>+</sup> 1 |
| Calycosin-7-O-β-D-glucoside                    | 21.238 | 446.12132 | C22 H22 O10     | 7.46×10 <sup>7</sup> | [M+H] <sup>+</sup> 1 |
| Dibutyl phthalate                              | 43.028 | 278.15192 | C16 H22 O4      | 7.17×10 <sup>7</sup> | [M+H] <sup>+</sup> 1 |
| D-Saccharic acid                               | 18.56  | 210.03752 | C6 H10 O8       | 6.96×10 <sup>7</sup> | [M-H] <sup>-</sup> 1 |
| 9S,13R-12-Oxophytodienoic acid                 | 27.045 | 292.20366 | C18 H28 O3      | 6.88×10 <sup>7</sup> | [M+H] <sup>+</sup> 1 |
| Cytidine                                       | 2.467  | 243.08568 | C9 H13 N3 O5    | 6.86×10 <sup>7</sup> | [M+H] <sup>+</sup> 1 |
| Padmatin                                       | 19.854 | 318.07393 | C16 H14 O7      | 6.8×10 <sup>7</sup>  | [M+H] <sup>+</sup> 1 |
| Phlinoside A                                   | 21.473 | 786.25859 | C35 H46 O20     | 6.65×10 <sup>7</sup> | [M-H] <sup>-</sup> 1 |
| DL-Lysine                                      | 1.217  | 146.10562 | C6 H14 N2 O2    | 6.57×10 <sup>7</sup> | [M+H] <sup>+</sup> 1 |
| Guanosine monophosphate (GMP)                  | 3.075  | 363.05817 | C10 H14 N5 O8 P | 6.42×10 <sup>7</sup> | [M-H] <sup>-</sup> 1 |
| Syringic acid                                  | 17.672 | 198.05282 | C9 H10 O5       | 6.41×10 <sup>7</sup> | [M-H] <sup>-</sup> 1 |
| Skatole                                        | 17.002 | 131.07352 | C9 H9 N         | 6.38×10 <sup>7</sup> | [M+H] <sup>+</sup> 1 |
| Artemetin                                      | 32.612 | 388.11597 | C20 H20 O8      | 6.35×10 <sup>7</sup> | [M+H] <sup>+</sup> 1 |
| Coumarin                                       | 21.03  | 146.03676 | C9 H6 O2        | 6.23×10 <sup>7</sup> | [M+H] <sup>+</sup> 1 |
| Penicillic acid                                | 17.14  | 170.05795 | C8 H10 O4       | 6.13×10 <sup>7</sup> | [M+H] <sup>+</sup> 1 |
| Ferulaldehyde                                  | 5.949  | 178.06316 | C10 H10 O3      | 6.11×10 <sup>7</sup> | [M+H] <sup>+</sup> 1 |
| Tectorigenin                                   | 25.007 | 300.06324 | C16 H12 O6      | 6.02×10 <sup>7</sup> | [M-H] <sup>-</sup> 1 |

|                                                       |        |           |                |                      |                      |
|-------------------------------------------------------|--------|-----------|----------------|----------------------|----------------------|
| Dehydrodiisoeugenol                                   | 23.376 | 326.15166 | C20 H22 O4     | 5.97×10 <sup>7</sup> | [M+H] <sup>+</sup> 1 |
| 7-Methoxy-4-methylcoumarin                            | 20.475 | 190.06311 | C11 H10 O3     | 5.94×10 <sup>7</sup> | [M+H] <sup>+</sup> 1 |
| Riboflavin                                            | 19.65  | 376.13838 | C17 H20 N4 O6  | 5.89×10 <sup>7</sup> | [M+H] <sup>+</sup> 1 |
| 5,2'-Dihydroxy-6,7,8,6'-tetramethoxyflavone           | 32.419 | 374.10037 | C19 H18 O8     | 5.83×10 <sup>7</sup> | [M+H] <sup>+</sup> 1 |
| Pinocembrin                                           | 24.496 | 256.07357 | C15 H12 O4     | 5.79×10 <sup>7</sup> | [M+H] <sup>+</sup> 1 |
| Catechol                                              | 15.603 | 110.03672 | C6 H6 O2       | 5.75×10 <sup>7</sup> | [M-H] <sup>-</sup> 1 |
| (2Z)-2-Octyl-2-pentenedioic acid                      | 20.946 | 242.15188 | C13 H22 O4     | 5.75×10 <sup>7</sup> | [M-H] <sup>-</sup> 1 |
| 4',7-Dihydroxyflavanone                               | 26.048 | 256.07356 | C15 H12 O4     | 5.63×10 <sup>7</sup> | [M+H] <sup>+</sup> 1 |
| Matairesinol                                          | 21.718 | 358.14158 | C20 H22 O6     | 5.52×10 <sup>7</sup> | [M+H] <sup>+</sup> 1 |
| 4-Coumaric acid                                       | 23.588 | 164.04742 | C9 H8 O3       | 5.46×10 <sup>7</sup> | [M-H] <sup>-</sup> 1 |
| Orientin                                              | 20.65  | 448.10083 | C21 H20 O11    | 5.46×10 <sup>7</sup> | [M-H] <sup>-</sup> 1 |
| 3,4-Dimethylbenzoic acid                              | 19.156 | 150.06813 | C9 H10 O2      | 5.37×10 <sup>7</sup> | [M+H] <sup>+</sup> 1 |
| Suberic acid                                          | 21.12  | 174.08911 | C8 H14 O4      | 5.33×10 <sup>7</sup> | [M-H] <sup>-</sup> 1 |
| 4-Acetyl-3-hydroxy-5-methylphenyl β-D-glucopyranoside | 19.361 | 328.11592 | C15 H20 O8     | 5.28×10 <sup>7</sup> | [M-H] <sup>-</sup> 1 |
| Pantothenic acid                                      | 16.8   | 219.11078 | C9 H17 N O5    | 5.24×10 <sup>7</sup> | [M+H] <sup>+</sup> 1 |
| Eriodictyol                                           | 21.027 | 288.06346 | C15 H12 O6     | 5.19×10 <sup>7</sup> | [M+H] <sup>+</sup> 1 |
| Atractylenolide I                                     | 40.772 | 230.1308  | C15 H18 O2     | 4.79×10 <sup>7</sup> | [M+H] <sup>+</sup> 1 |
| Obacunone                                             | 23.897 | 454.19902 | C26 H30 O7     | 4.73×10 <sup>7</sup> | [M+H] <sup>+</sup> 1 |
| 3,4-Dihydroxyphenylethanol                            | 15.867 | 154.063   | C8 H10 O3      | 4.69×10 <sup>7</sup> | [M-H] <sup>-</sup> 1 |
| Uridine monophosphate (UMP)                           | 2.23   | 324.03572 | C9 H13 N2 O9 P | 4.59×10 <sup>7</sup> | [M-H] <sup>-</sup> 1 |
| Quinic acid                                           | 16.434 | 192.06343 | C7 H12 O6      | 4.4×10 <sup>7</sup>  | [M-H] <sup>-</sup> 1 |
| Glabrone                                              | 38.64  | 336.09969 | C20 H16 O5     | 4.35×10 <sup>7</sup> | [M+H] <sup>+</sup> 1 |
| Arglabin                                              | 29.111 | 246.1256  | C15 H18 O3     | 4.35×10 <sup>7</sup> | [M+H] <sup>+</sup> 1 |
| Abscisic acid                                         | 23.965 | 264.13608 | C15 H20 O4     | 4.31×10 <sup>7</sup> | [M-H] <sup>-</sup> 1 |
| α-Eleostearic acid                                    | 40.204 | 278.22469 | C18 H30 O2     | 4.3×10 <sup>7</sup>  | [M+H] <sup>+</sup> 1 |
| Pholedrine                                            | 7.212  | 165.11548 | C10 H15 N O    | 4.29×10 <sup>7</sup> | [M+H] <sup>+</sup> 1 |
| 1-Methyladenosine                                     | 16.219 | 281.11244 | C11 H15 N5 O4  | 4.29×10 <sup>7</sup> | [M+H] <sup>+</sup> 1 |
| Medicarpin                                            | 25.402 | 270.08916 | C16 H14 O4     | 4.2×10 <sup>7</sup>  | [M+H] <sup>+</sup> 1 |
| Glycitin                                              | 23.368 | 446.12147 | C22 H22 O10    | 4.18×10 <sup>7</sup> | [M+H] <sup>+</sup> 1 |
| (9Z,12Z)-6,8-Dihydroxy-9,12-octadecadienoic acid      | 35.763 | 312.23024 | C18 H32 O4     | 3.79×10 <sup>7</sup> | [M-H] <sup>-</sup> 1 |
| Secoisolariciresinol                                  | 23.377 | 362.17326 | C20 H26 O6     | 3.72×10 <sup>7</sup> | [M-H] <sup>-</sup> 1 |
| Citral                                                | 22.472 | 152.12018 | C10 H16 O      | 3.68×10 <sup>7</sup> | [M+H] <sup>+</sup> 1 |
| Rosarin                                               | 22.62  | 428.16786 | C20 H28 O10    | 3.65×10 <sup>7</sup> | [M-H] <sup>-</sup> 1 |
| Linderalactone                                        | 23.501 | 244.10993 | C15 H16 O3     | 3.63×10 <sup>7</sup> | [M+H] <sup>+</sup> 1 |
| 16α-Hydroxyestrone                                    | 27.474 | 286.15833 | C18 H22 O3     | 3.6×10 <sup>7</sup>  | [M+H] <sup>+</sup> 1 |

|                                           |        |           |                 |                      |         |
|-------------------------------------------|--------|-----------|-----------------|----------------------|---------|
| Shikimic acid                             | 2.154  | 174.05273 | C7 H10 O5       | 3.51×10 <sup>7</sup> | [M-H]-1 |
| (+/-)9,10-dihydroxy-12Z-octadecenoic acid | 35.808 | 314.246   | C18 H34 O4      | 3.43×10 <sup>7</sup> | [M-H]-1 |
| 2-Hydroxybenzyl alcohol                   | 15.876 | 124.05242 | C7 H8 O2        | 3.39×10 <sup>7</sup> | [M-H]-1 |
| β-Asarone                                 | 26.02  | 208.10993 | C12 H16 O3      | 3.38×10 <sup>7</sup> | [M+H]+1 |
| β-Asarone                                 | 21.896 | 208.10993 | C12 H16 O3      | 3.37×10 <sup>7</sup> | [M+H]+1 |
| Manninotriose                             | 5.195  | 504.16934 | C18 H32 O16     | 3.29×10 <sup>7</sup> | [M-H]-1 |
| Curcumenol                                | 28.198 | 234.16207 | C15 H22 O2      | 3.07×10 <sup>7</sup> | [M+H]+1 |
| Genistein                                 | 27.246 | 270.05286 | C15 H10 O5      | 2.88×10 <sup>7</sup> | [M-H]-1 |
| Gardenin B                                | 27.929 | 358.10524 | C19 H18 O7      | 2.87×10 <sup>7</sup> | [M+H]+1 |
| 16-Hydroxyhexadecanoic acid               | 45.815 | 272.23527 | C16 H32 O3      | 2.85×10 <sup>7</sup> | [M-H]-1 |
| Calycosin                                 | 25.38  | 284.06847 | C16 H12 O5      | 2.77×10 <sup>7</sup> | [M+H]+1 |
| 2',4'-Dihydroxydihydrochalcone            | 29.382 | 242.0943  | C15 H14 O3      | 2.75×10 <sup>7</sup> | [M-H]-1 |
| Jasmonic acid                             | 29.849 | 210.12557 | C12 H18 O3      | 2.74×10 <sup>7</sup> | [M+H]+1 |
| Fraxinellone                              | 23.491 | 232.10994 | C14 H16 O3      | 2.69×10 <sup>7</sup> | [M+H]+1 |
| (+/-)12(13)-DiHOME                        | 35.393 | 314.24598 | C18 H34 O4      | 2.68×10 <sup>7</sup> | [M-H]-1 |
| Xanthosine                                | 15.127 | 284.07564 | C10 H12 N4 O6   | 2.61×10 <sup>7</sup> | [M-H]-1 |
| 2'-Deoxyadenosine-5'-monophosphate        | 4.779  | 331.06841 | C10 H14 N5 O6 P | 2.53×10 <sup>7</sup> | [M+H]+1 |
| Isoferulic acid                           | 24.234 | 194.05792 | C10 H10 O4      | 2.51×10 <sup>7</sup> | [M-H]-1 |
| Safrole                                   | 33.451 | 162.06816 | C10 H10 O2      | 2.48×10 <sup>7</sup> | [M+H]+1 |
| Methohexital                              | 17.927 | 262.1317  | C14 H18 N2 O3   | 2.45×10 <sup>7</sup> | [M+H]+1 |
| Thymol                                    | 28.233 | 150.10454 | C10 H14 O       | 2.43×10 <sup>7</sup> | [M+H]+1 |
| β-Estradiol                               | 29.172 | 272.1776  | C18 H24 O2      | 2.38×10 <sup>7</sup> | [M+H]+1 |
| Daidzein                                  | 24.307 | 254.05791 | C15 H10 O4      | 2.36×10 <sup>7</sup> | [M+H]+1 |
| Alisol C 23-acetate                       | 27.024 | 528.34545 | C32 H48 O6      | 2.15×10 <sup>7</sup> | [M+H]+1 |
| Shogaol                                   | 32.04  | 276.17281 | C17 H24 O3      | 2.13×10 <sup>7</sup> | [M+H]+1 |
| Osajin                                    | 45.214 | 404.16271 | C25 H24 O5      | 2.06×10 <sup>7</sup> | [M+H]+1 |
| 1-Hydroxycyclohexyl phenyl ketone         | 24.809 | 204.11508 | C13 H16 O2      | 1.82×10 <sup>7</sup> | [M+H]+1 |
| Xanthine                                  | 4.605  | 152.03351 | C5 H4 N4 O2     | 1.74×10 <sup>7</sup> | [M-H]-1 |
| Eupatilin                                 | 31.77  | 344.08951 | C18 H16 O7      | 1.58×10 <sup>7</sup> | [M+H]+1 |
| TDIQ                                      | 15.977 | 177.07901 | C10 H11 N O2    | 1.58×10 <sup>7</sup> | [M+H]+1 |
| 4'-Methoxychalcone                        | 24.292 | 238.09931 | C16 H14 O2      | 1.36×10 <sup>7</sup> | [M+H]+1 |
| Testosterone 17-Undecanoate               | 46.381 | 456.36061 | C30 H48 O3      | 1.27×10 <sup>7</sup> | [M-H]-1 |
| Racemosin                                 | 31.472 | 288.09975 | C16 H16 O5      | 1.27×10 <sup>7</sup> | [M+H]+1 |
| 3-Allyl-2-hydroxybenzoic acid             | 30.191 | 178.06309 | C10 H10 O3      | 1.25×10 <sup>7</sup> | [M-H]-1 |
| Mulberrin                                 | 42.906 | 422.1732  | C25 H26 O6      | 1.24×10 <sup>7</sup> | [M+H]+1 |



|                                        |        |           |                 |                      |         |
|----------------------------------------|--------|-----------|-----------------|----------------------|---------|
| Ambrosic acid                          | 27.751 | 264.13606 | C15 H20 O4      | 1.23×10 <sup>7</sup> | [M-H]-1 |
| 3-Hydroxyfluorene                      | 32.986 | 182.07335 | C13 H10 O       | 1.2×10 <sup>7</sup>  | [M+H]+1 |
| Dodecanedioic acid                     | 29.252 | 230.15176 | C12 H22 O4      | 1.17×10 <sup>7</sup> | [M-H]-1 |
| Hexadecanedioic acid                   | 37.764 | 286.21452 | C16 H30 O4      | 1.17×10 <sup>7</sup> | [M-H]-1 |
| Indole-3-lactic acid                   | 16.464 | 205.07405 | C11 H11 N<br>O3 | 1.06×10 <sup>7</sup> | [M+H]+1 |
| 9-Oxo-10(E),12(E)-octadecadienoic acid | 41.767 | 294.21964 | C18 H30 O3      | 1.04×10 <sup>7</sup> | [M+H]+1 |
| Clareolide                             | 30.111 | 250.19332 | C16 H26 O2      | 1.01×10 <sup>7</sup> | [M+H]+1 |
| Cyclohexyl phenyl ketone               | 39.367 | 188.12024 | C13 H16 O       | 9.34×10 <sup>6</sup> | [M+H]+1 |
| α-Linolenic acid                       | 40.782 | 278.22469 | C18 H30 O2      | 8.7×10 <sup>6</sup>  | [M+H]+1 |
| Biochanin A                            | 32.996 | 284.06863 | C16 H12 O5      | 8.58×10 <sup>6</sup> | [M+H]+1 |
| Docosatrienoic acid                    | 46.213 | 334.28722 | C22 H38 O2      | 8.45×10 <sup>6</sup> | [M+H]+1 |
| 3,3',5,5'-Tetramethyldiphenone         | 40.497 | 240.11507 | C16 H16 O2      | 7.29×10 <sup>6</sup> | [M+H]+1 |
| Roburic acid                           | 51.106 | 440.36568 | C30 H48 O2      | 6.82×10 <sup>6</sup> | [M+H]+1 |
| Kanzakiflavone 2                       | 34.813 | 298.04781 | C16 H10 O6      | 6.05×10 <sup>6</sup> | [M+H]+1 |
| Bavachinin                             | 39.007 | 338.15221 | C21 H22 O4      | 5.49×10 <sup>6</sup> | [M+H]+1 |
| Ciliatin A                             | 39.25  | 336.09972 | C20 H16 O5      | 4.08×10 <sup>6</sup> | [M+H]+1 |
| Oleoyl ethanolamide                    | 46.115 | 325.29823 | C20 H39 N<br>O2 | 3.35×10 <sup>6</sup> | [M+H]+1 |
| Polygalic acid                         | 28.289 | 488.31404 | C29 H44 O6      | 1.9×10 <sup>6</sup>  | [M+H]+1 |
